# Supplementary material for: Quasi-square-shaped cadmium hydroxide nanocatalysts for electrochemical CO2 reduction with high efficiency
Source: Royal Society of Chemistry journal article supplement (doi:10.1039/d1sc02328d), 2021-01-01
Supplement: d1sc02328d1.pdf [file d1sc02328d1.pdf]

# Novel Quasi-Square-Shaped Cadmium Hydroxide Nanocatalyst to Improve Electrochemical Reduction of Carbon Dioxide to Carbon Monoxide

Electrochemical reduction of carbon dioxide ( $\text{CO}_2$ ) using renewable electricity can reduce  $\text{CO}_2$  emission, producing carbon monoxide (CO) for commercialisation as a feedstock for chemicals and fuels

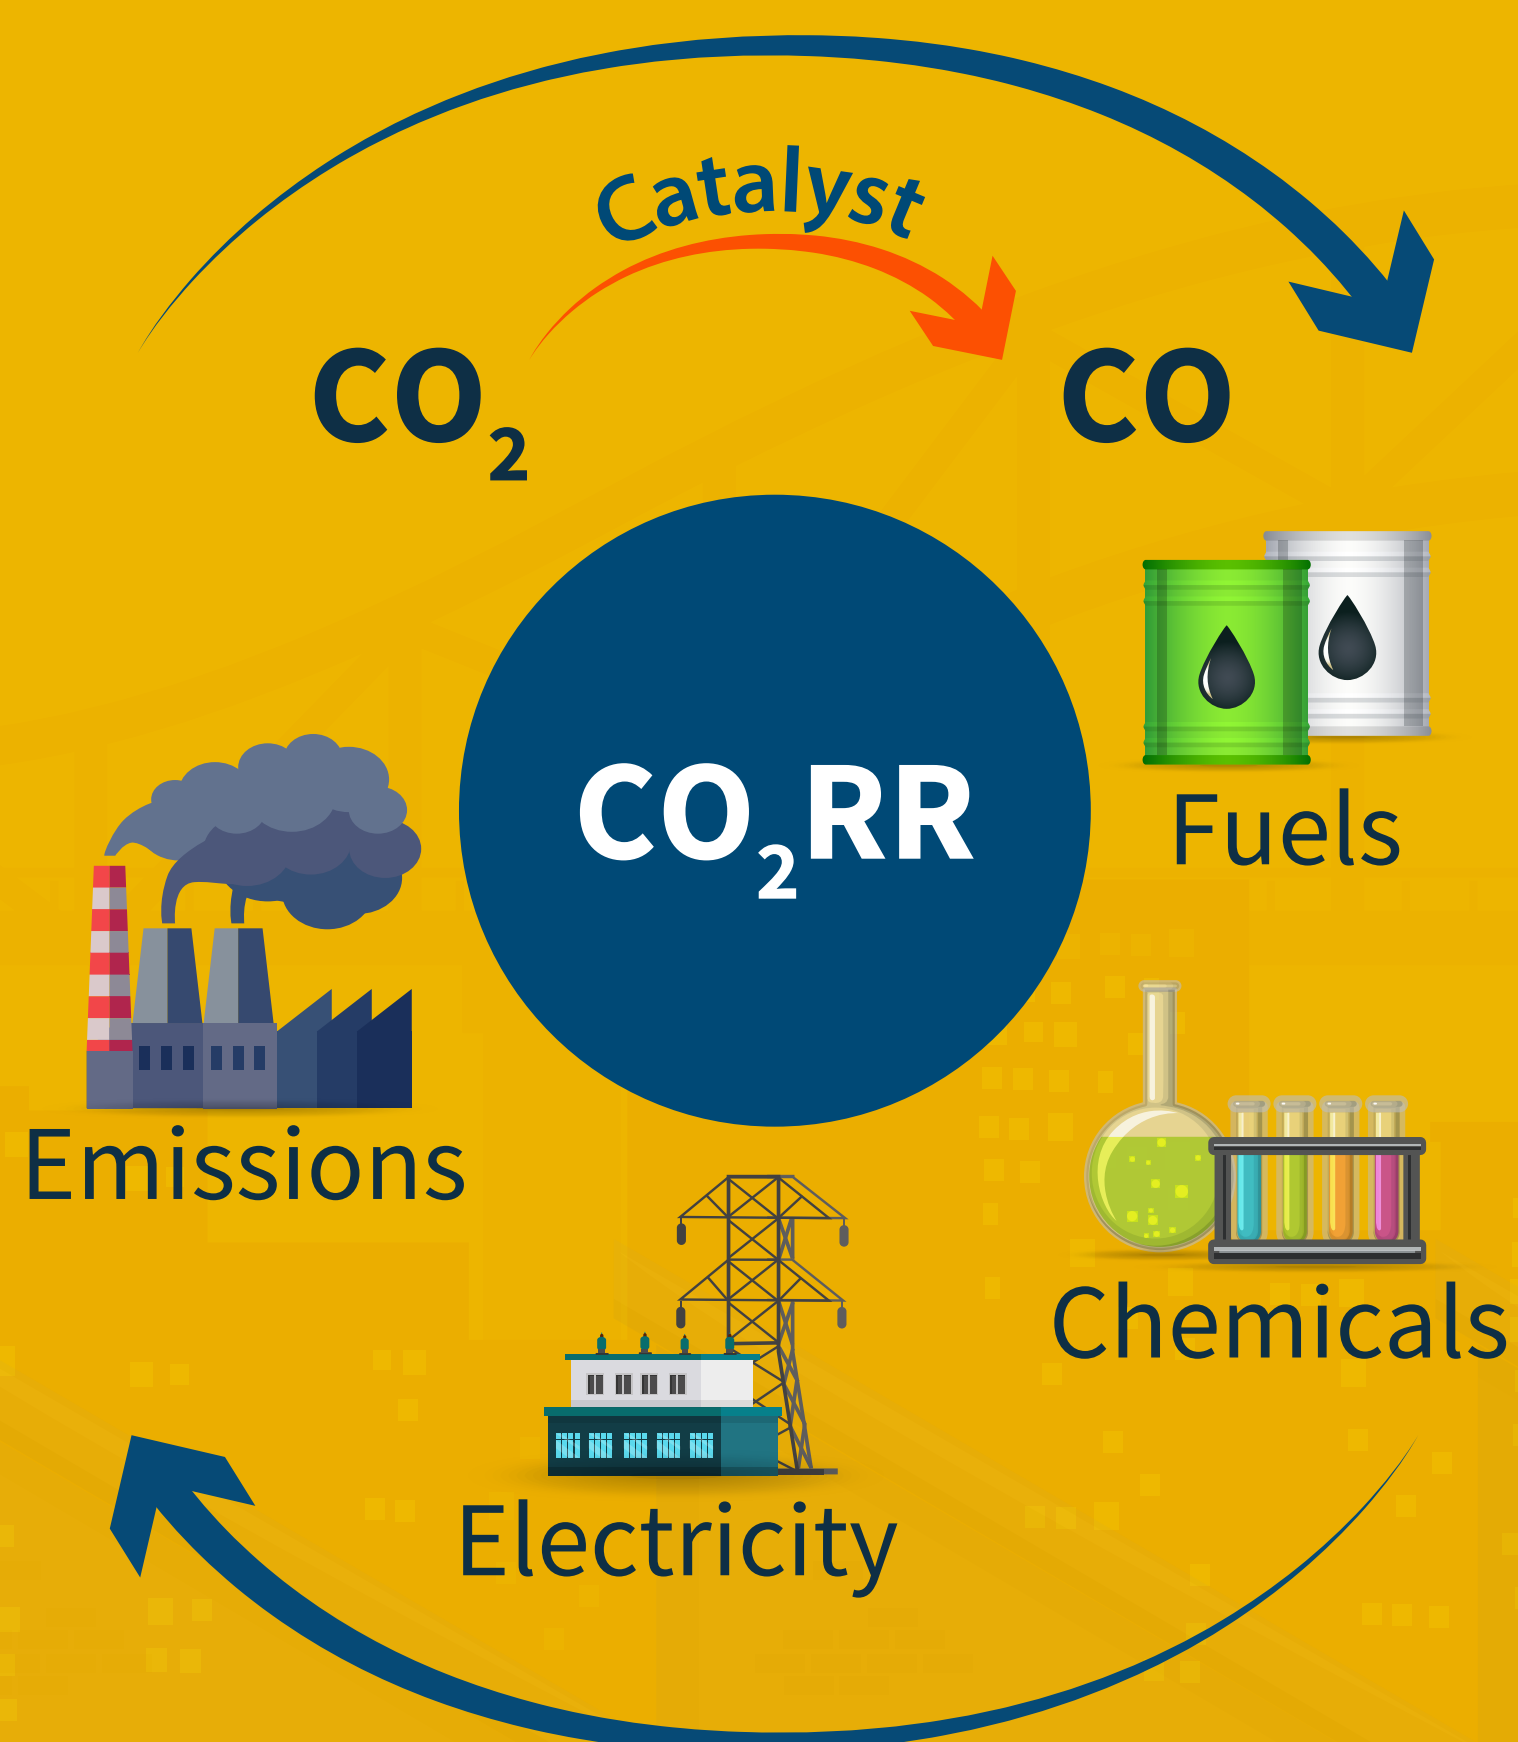

## But it has disadvantages:

- ↓ Low capture rate of  $\text{CO}_2$  at source
- ↓ Poor catalytic activity and selectivity
- ↓ Low conversion to CO

The efficient reduction of  $\text{CO}_2$  to CO is proposed by combining a novel quasi-square-shaped cadmium hydroxide (Cdhy-QS) nanocatalyst with an adsorption-electrolysis device

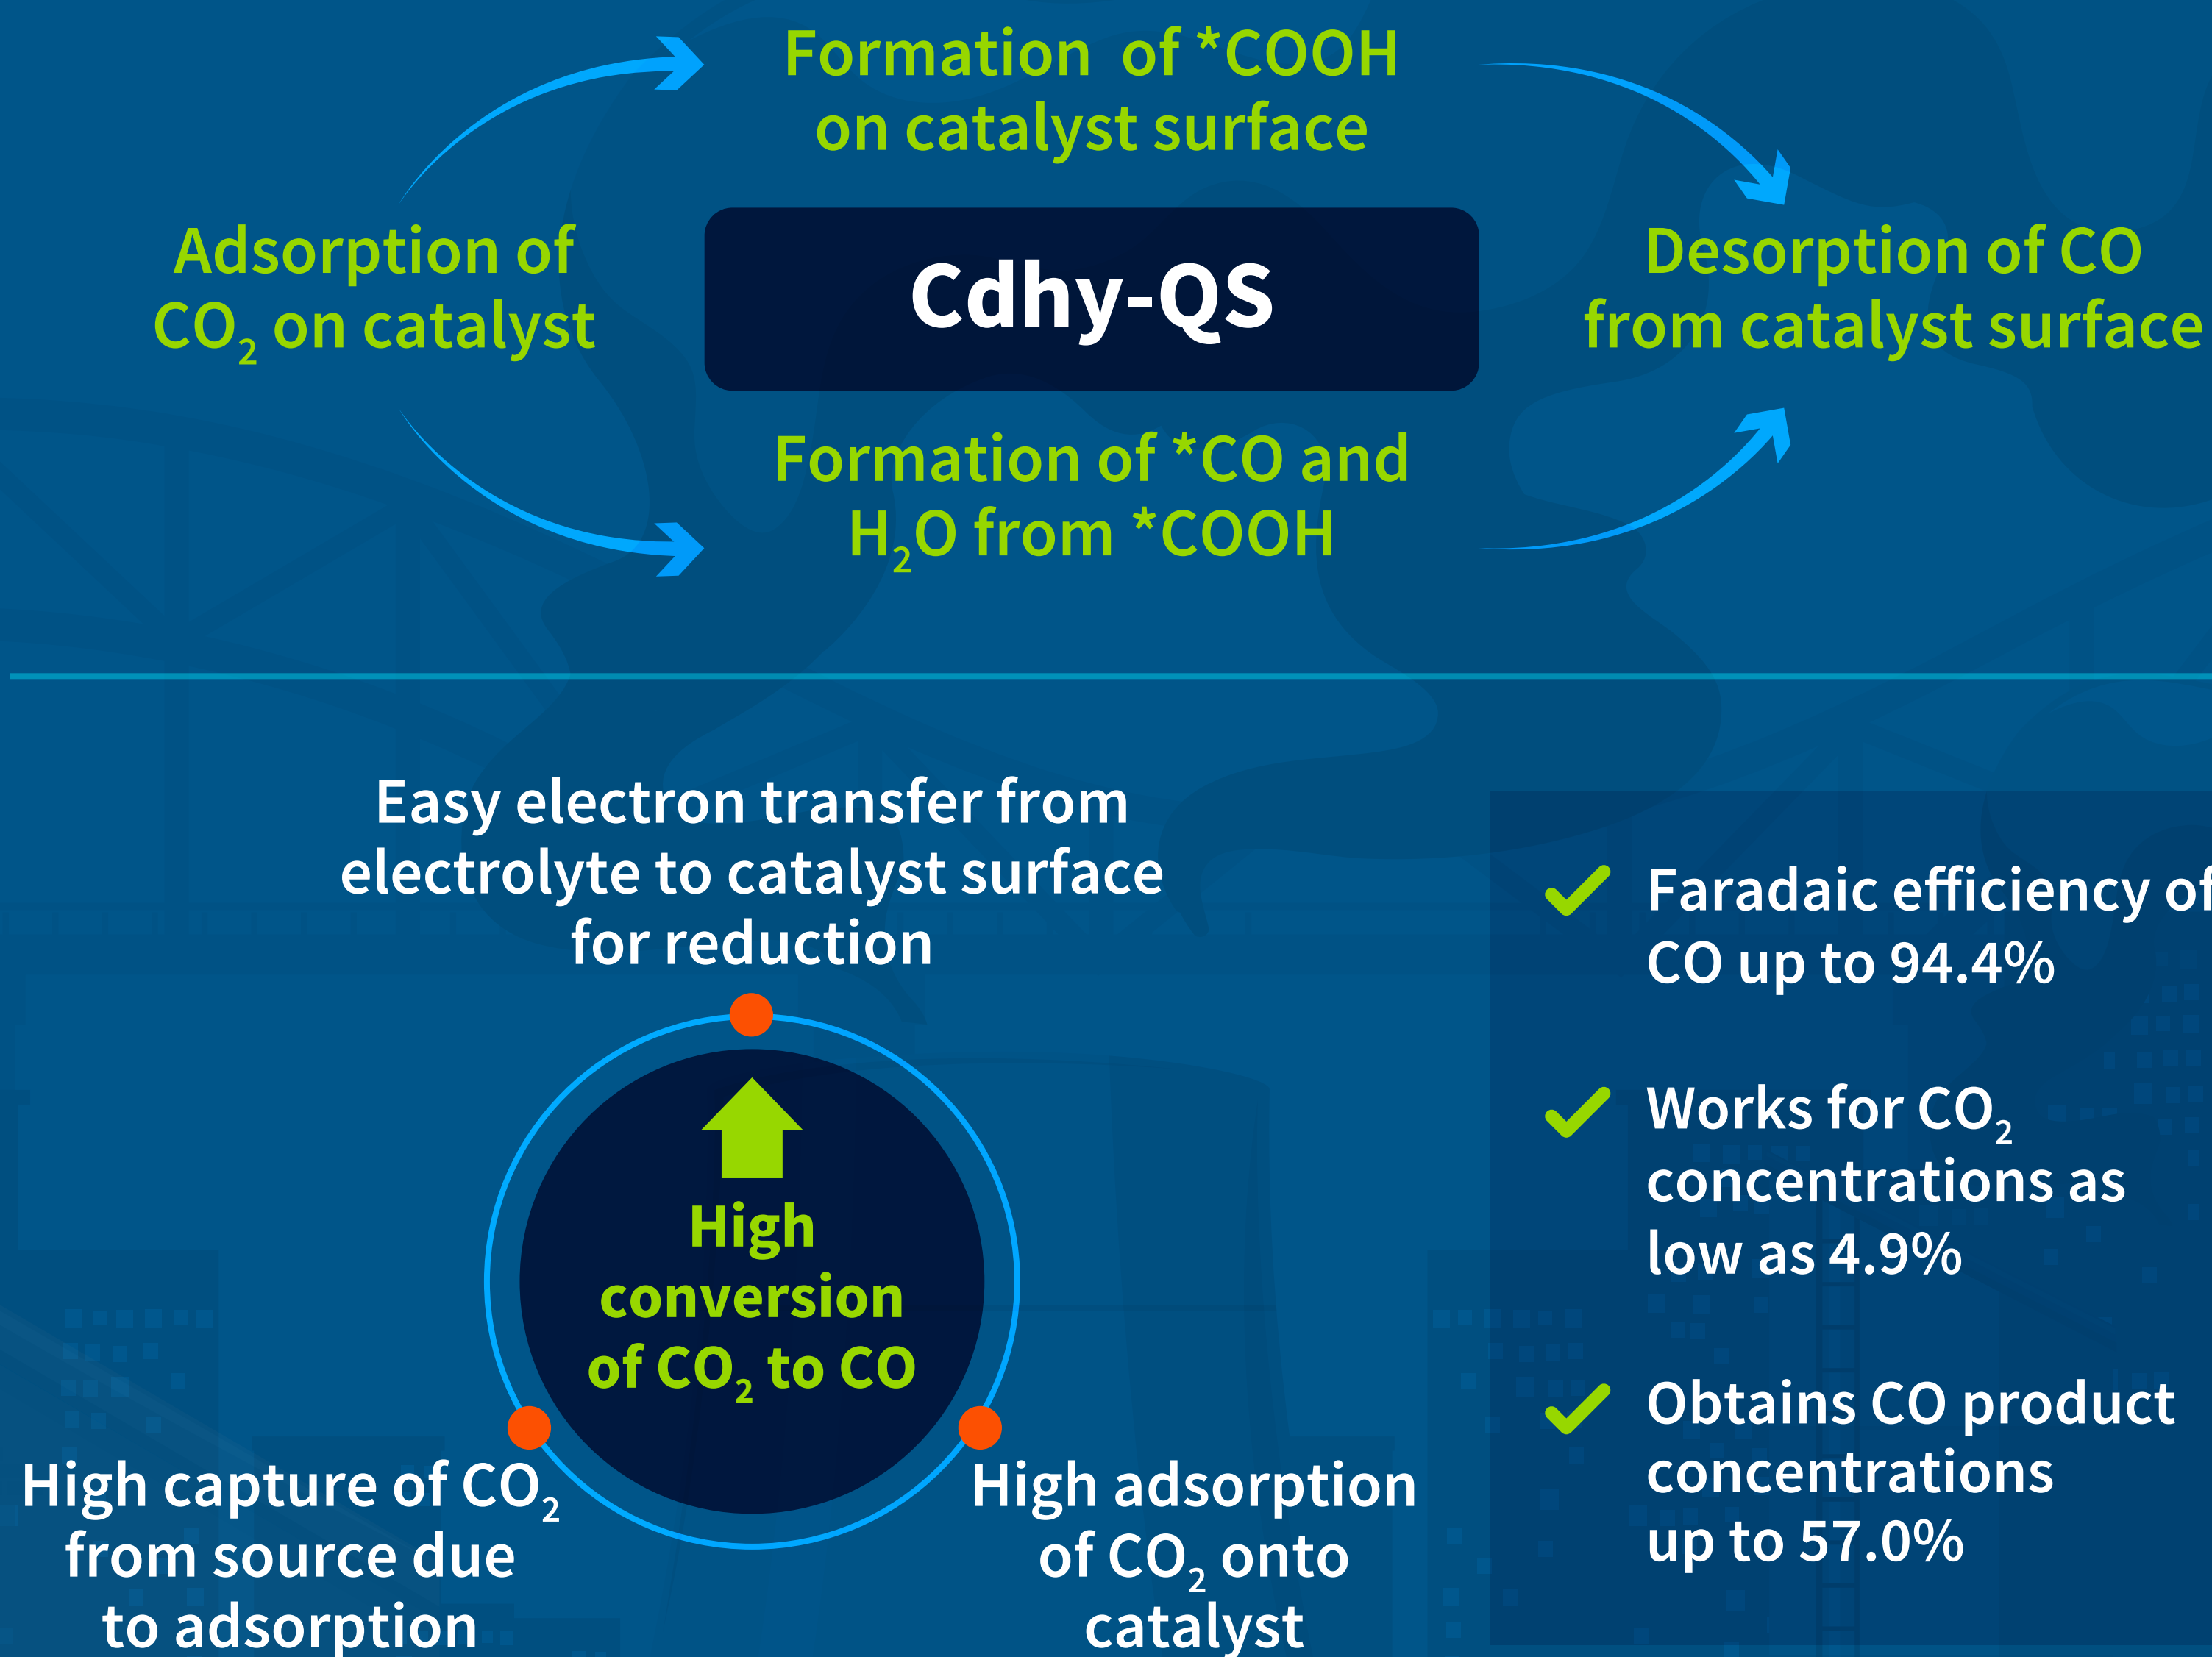

- ✓ Faradaic efficiency of CO up to 94.4%
- ✓ Works for  $\text{CO}_2$  concentrations as low as 4.9%
- ✓ Obtains CO product concentrations up to 57.0%

The combined action of Cdhy-QS nanocatalyst and an adsorption-electrolysis device system can generate high concentrations of CO at low  $\text{CO}_2$  concentrations
